# Supplementary material for: Silicon stable isotope distribution traces Southern Ocean export of Si to the eastern South Pacific thermocline
Source: Copernicus journal article supplement (doi:10.5194/bg-9-4199-2012), 2012-11-01
Supplement: Supplementary file 1 [file bg-9-4199-2012-supplement.zip]

Archive with 2 entries (2 files):
- bg-2012-172_supplementarymaterial.pdf
- bg-2012-172_supplementarytable1.xls
