# Supplementary material for: Silicon stable isotope distribution traces Southern Ocean export of Si to the eastern South Pacific thermocline
Source: Copernicus journal article supplement (doi:10.5194/bg-9-4199-2012), 2012-11-01
Supplement: Supplementary file 1 [file bg-9-4199-2012-supplement.zip › bg-2012-172_supplementarytable1.xls]

## Sheet: Sheet1
SUPPLEMENTARY TABLE 1 to G. F. de Souza, et al.: Silicon stable isotope disitribution traces
Southern Ocean export of Si to the South Pacific thermocline (manuscript bg-2012-172)
Data table containing silicon isotope data with key physical & biogeochemical parameters
n = number of complete d30Si replicates
Station	Latitude	Depth	gn	q	S	[O2]	[PO4]	[NO3]	[Si]	Si*	d30Si	2sSDa	nb
		m	kg/m3	°C	psu	mM	mM	mM	mM	mM	‰	external
CLIVAR P18 re-occupation (103°W)
70	11° 45' S	5	24.567	22.7169	35.7143	227.042	0.6557	6.6596	1.4344	-5.2252	-	-	-
		33	24.632	22.4525	35.7004	226.442	0.6865	6.7625	1.5369	-5.2256	-	-	-
		83	25.189	20.6384	35.7635	219.285	0.6869	4.2032	2.0503	-2.1529	-	-	-
		133*	25.4	19.036	35.4825	186.414	0.8613	7.3828	2.666	-4.7168	1.72507	0.213798	1
		182	26.274	13.0793	34.8038	8.7229	2.5964	25.1425	19.0878	-6.0547	-	-	-
		215	26.557	11.6854	34.8027	14.1656	2.597	29.6657	24.2253	-5.4404	1.49195	0.12	1
		265	26.722	10.783	34.7902	-	2.4845	33.3662	27.0009	-6.3652	1.57401	0.12	1
		314	26.814	10.1523	34.7583	20.9454	2.6079	35.6278	31.3155	-4.3123	1.49831	0.12	3
		430	26.962	8.9567	34.676	23.4127	2.752	38.8157	35.5298	-3.286	1.415	0.16	2
		625	27.21	6.9585	34.5724	27.526	3.0505	43.7539	46.4244	2.6704	1.39162	0.12	3
		824	27.401	5.3991	34.5273	49	3.1331	44.7883	62.7652	17.9769	1.37831	0.19	3
		1024	27.555	4.2799	34.5387	74.383	3.0513	43.2531	82.6021	39.349	1.35042	0.11	2
		1172	27.636	3.7618	34.5566	85.69	3.0002	42.434	94.0124	51.5784	-	-	-
		1454	27.767	2.9573	34.5934	97.6186	2.9388	41.4108	114.779	73.3681	1.36271	0.165513	1
		1848	27.88	2.269	34.6319	118.078	2.7849	39.6675	131.129	91.4613	1.25017	0.12	3
		2241	27.962	1.8311	34.6606	135.761	2.6618	38.4365	137.714	99.2771	1.26024	0.12	2
		2831	28.017	1.5654	34.6798	141.829	2.6208	38.1295	147.379	109.25	1.2742	0.12	4
		3533	28.028	1.4968	34.6788	141.11	2.631	38.2324	153.444	115.211	1.2693	0.12	2
		3776	28.03	1.4887	34.6797	141.316	2.6311	38.2324	154.163	115.931	-	-	-
		4132	28.031	1.4841	34.6805	141.111	2.6208	38.2325	154.369	116.136	1.27161	0.12	2
95	26 20' S	6	24.407	24.2925	36.1155	217.378	0.1024	0.2049	0.7171	0.5122	-	-	-
		46	25.037	21.7415	35.9659	232.373	0.1025	0.205	0.7175	0.5125	-	-	-
		105	25.328	20.5538	35.9177	235.002	0.123	0.2051	0.7177	0.5127	-	-	-
		206	25.575	18.2758	35.4583	233.929	0.1538	0.5128	0.7179	0.2051	-	-	-
		366*	26.458	10.7061	34.4397	188.24	1.283	17.7566	5.6452	-12.1114	1.79782	0.12	2
		430	26.802	8.5806	34.3982	136.245	2.0637	27.8239	13.8606	-13.9633	1.6632	0.19	2
		629	27.167	5.8408	34.3134	210.13	1.9514	29.6812	15.2	-14.4811	1.76493	0.12	4
		727	27.239	5.3316	34.31	196.996	2.1363	31.9425	21.3635	-10.579	-	-	-
		826	27.327	4.887	34.3426	171.64	2.3625	35.0264	31.9449	-3.0815	1.55216	0.12	2
		924	27.424	4.4418	34.393	144.535	2.5784	37.803	46.7402	8.9371	1.33435	0.19	2
		1022	27.513	3.9048	34.4216	140.848	2.63	38.5251	58.4554	19.9303	1.31395	0.12	3
		1122	27.586	3.6075	34.4681	134.59	2.6815	39.0413	70.2744	31.233	1.39038	0.21	3
		1223	27.647	3.3222	34.4995	134.905	2.6714	39.0433	78.4976	39.4543	-	-	-
		1321	27.734	2.9083	34.543	143.032	2.6099	38.2241	88.0592	49.8351	-	-	-
		1418	27.783	2.6633	34.5683	149.409	2.5792	37.8146	93.0979	55.2833	1.35656	0.12	1
		1518	27.837	2.3963	34.5963	154.04	2.5382	37.3025	101.528	64.226	1.35483	0.12	2
		1650	27.869	2.2071	34.608	156.818	2.5177	36.8923	107.286	70.3934	1.32608	0.12	2
		1849	27.925	1.9685	34.6397	159.702	2.487	36.6884	116.54	79.8512	-	-	-
		2044	27.948	1.85	34.6486	160.424	2.4973	36.5862	120.858	84.2716	1.27584	0.12	2
		2105	27.96	1.8098	34.6561	160.323	2.4871	36.5865	122.606	86.0194	1.27133	0.12	2
114	37° 25' S	9	24.04	20.2668	34.1496	237.373	0.3994	4.6082	0.1024	-4.5058	-	-	-
		116	25.883	12.4143	34.1364	271.848	0.595	7.5912	0.6155	-6.9757	-	-	-
		191	26.353	10.3609	34.2304	249.491	0.975	14.1628	1.3342	-12.8286	-	-	-
		379*	27.018	6.8224	34.3156	252.31	1.5095	22.9	6.3668	-16.5332	2.04907	0.3	2
		660	27.165	5.6798	34.2803	254.394	1.7049	25.6756	10.681	-14.9946	1.90631	0.34	5
		858	27.286	4.7679	34.271	228.022	2.0234	29.8893	20.1316	-9.7577	1.78601	0.135302	1
		1057	27.444	3.8716	34.3257	191.584	2.3627	34.3106	38.8305	4.52	1.53	0.12	3
		1156	27.538	3.4864	34.3871	167.047	2.5478	36.5737	53.7304	17.1567	1.48351	0.12	4
		1319	27.647	3.156	34.4725	139.939	2.7227	38.5294	73.3599	34.8305	1.4509	0.12	4
		1516	27.745	2.8065	34.5427	134.916	2.7333	38.6354	90.4233	51.7879	-	-	-
		2106	27.935	1.9549	34.6503	163.609	2.4973	35.8666	109.141	73.2747	1.35636	0.2	4
		2499	27.995	1.6802	34.6855	193.01	2.4563	35.3544	117.471	82.1168	1.3864	0.12	2
		2891	28.024	1.5673	34.6907	173.794	2.4358	35.1493	119.631	84.4816	1.3516	0.12	2
		3365	28.088	1.2498	34.7036	185.619	2.3845	34.5337	123.849	89.315	1.31262	0.12	2
136	50° 15' S	5	26.475	9.3851	34.1695	290.165	1.2112	16.7304	1.7449	-14.9855	-	-	-
		99*	26.832	7.345	34.1936	299.909	1.3553	17.7625	3.1829	-14.5796	2.78895	0.141384	1
		322	27.069	6.4023	34.3001	281.281	1.5199	21.7713	7.1886	-14.5827	2.04725	0.27	2
		644	27.166	5.5296	34.2547	256.139	1.7973	25.9837	13.454	-12.5297	1.76842	0.18	2
		940	27.383	4.2295	34.3052	216.33	2.188	31.7408	32.1517	0.4109	-	-	-
		1087	27.488	3.5755	34.3375	206.796	2.3217	33.49	42.9412	9.4512	1.53837	0.13	4
		1579	27.783	2.4894	34.543	176.125	2.4764	35.6565	75.7316	40.075	1.46611	0.12	3
		1972	27.911	2.1612	34.6574	174.706	2.4151	34.7357	89.6141	54.8783	1.37	0.12	4
		2366	27.993	1.8268	34.7007	178.725	2.3844	34.3267	102.158	67.8312	-	-	-
		2757	28.047	1.5133	34.708	182.122	2.3844	34.3277	113.158	78.8303	1.32222	0.12	2
		3538	28.153	0.9205	34.7139	198.78	2.3537	34.0209	125.908	91.8872	1.2903	0.12	2
		3928	28.216	0.5377	34.7106	209.474	2.3538	34.1244	135.778	101.654	1.27435	0.12	2
149	57° 45' S	15*	26.784	6.5509	34.0378	309.248	1.4887	21.0478	3.3882	-17.6596	3.23458	0.12	1
		58	26.801	6.4585	34.0392	308.739	1.4888	20.9454	3.3882	-17.5572	-	-	-
		107*	27.001	5.3918	34.0703	309.505	1.643	22.1809	6.264	-15.9168	2.69735	0.12	1
		215	27.196	4.3282	34.1037	299.998	1.7768	25.5733	11.4001	-14.1731	2.0703	0.12	2
		428	27.332	4.0464	34.2127	248.366	2.0543	29.9929	23.83	-6.1629	1.6344	0.14	2
		624	27.464	3.2708	34.2618	228.465	2.26	32.7699	37.2899	4.52	1.5869	0.21	2
		824	27.597	2.8464	34.3634	204.245	2.4041	34.7258	52.8079	18.0821	1.53948	0.17	1
		1054	27.728	2.5859	34.4853	183.411	2.466	35.6546	67.8157	32.1611	1.37	0.14	1
158	62° 15' S	4*	27.078	3.8067	33.9095	328.517	1.6944	25.0573	6.2643	-18.793	3.07074	0.12	1
		32*	27.099	3.6979	33.9177	329.345	1.715	25.1604	6.7779	-18.3825	2.96637	0.194532	1
		174	27.507	0.9005	34.0483	313.733	2.1676	31.2295	33.2841	2.0546	1.8318	0.12	1
		330	27.616	2.094	34.2901	227.568	2.3938	34.726	52.2944	17.5685	1.56815	0.12	1
		428	27.69	2.3267	34.4033	198.815	2.4659	35.7559	62.3673	26.6114	1.56843	0.12	1
		987	27.929	2.0966	34.6682	182.005	2.3637	34.1196	83.8602	49.7406	1.25816	0.12	4
		1382	28.013	1.8158	34.7222	191.781	2.2714	32.7857	91.3682	58.5825	-	-	-
		2102	28.117	1.209	34.7292	202.171	2.2817	32.9928	108.948	75.9554	1.23138	0.12	3
		2494	28.151	0.963	34.7211	205.77	2.3023	33.1987	116.555	83.3565	-	-	-
		2918	28.186	0.7212	34.7139	209.986	2.3229	33.5074	124.162	90.6549	1.28861	0.12	2
		3405	28.222	0.475	34.7069	214.1	2.3332	33.6105	130.433	96.8228	1.2601	0.12	4
		3891	28.262	0.233	34.7035	219.138	2.3435	33.8164	134.855	101.038	1.22531	0.12	3
		4378	28.289	0.0893	34.7042	221.71	2.3435	33.8167	139.481	105.664	1.26321	0.138906	1
		4863	28.298	0.0262	34.7017	222.738	2.3538	33.9195	143.49	109.57	-	-	-
CLIVAR I06S re-occupation, Indo-Atlantic Sector of the Southern Ocean (30°E)
33	43° 30' S	2041	27.987	2.45	34.8006	213.1	1.9	28.1	60.8854	32.8	1.37951	0.12	1
		2602	28.056	2.09	34.821	224.7	1.9	27.2	65.1741	38	1.17612	0.14	1
		3202	28.119	1.53	34.7892	222.1	2	28.8	83.8511	55	1.27008	0.12	1
		3799	28.187	0.84	34.731	219	2.2	31.5	108.581	77.1	1.2456	0.12	1
		4400	28.242	0.34	34.6934	220.3	2.3	33.1	125.777	92.7	1.26479	0.12	1
		5125	28.309	-0.15	34.6686	134.5	2.3	33.6	134.463	100.9	1.24782	0.12	1
a errors are external 2sSD or internal 2sSD, whichever is larger.
b n refers to the number of complete replicates, i.e. repeated chromatography and mass spectrometry.
In some cases, these replicates also include replicated brucite co-precipitation.
* these low-[Si] samples have a filtration blank influence on measured d30Si that may exceed analytical
uncertainty (see main text and Supplement).
